# Supplementary material for: Nitrogen and sulfur co-doped CeO2 nanorods for efficient photocatalytic VOCs degradation
Source: Royal Society of Chemistry journal article supplement (doi:10.1039/d2cy00934j), 2022-01-01
Supplement: d2cy00934j1.pdf [file d2cy00934j1.pdf]

## *Supporting Information*

### **Nitrogen and sulfur co-doping CeO<sub>2</sub> nanorods for efficient photocatalytic VOCs degradation**

**Hui Yang<sup>a,c</sup>, Lu Jia<sup>a</sup>, Jun Haraguchi<sup>c</sup>, Yue Wang<sup>a</sup>, Bin Xu<sup>a,\*</sup>, Qitao Zhang<sup>b,\*</sup>, Zhaodong Nan<sup>a</sup>,  
Ming Zhang<sup>a</sup>, Teruhisa Ohno<sup>c,\*</sup>**

<sup>a</sup> School of Chemistry and Chemical Engineering, Yangzhou University, Yangzhou 225002, China

<sup>b</sup> International Collaborative Laboratory of 2D Materials for Optoelectronics Science and Technology of Ministry of Education, Institute of Microscale Optoelectronics, Shenzhen University, Shenzhen 518060, China

<sup>c</sup> Department of Applied Chemistry, Faculty of Engineering, Kyushu Institute of Technology, Kitakyushu 804-8550, Japan

**\*Corresponding authors: [twt@yzu.edu.cn](mailto:twt@yzu.edu.cn) (Bin Xu); [qitao-zhang@szu.edu.cn](mailto:qitao-zhang@szu.edu.cn) (Qitao Zhang);  
[tohno@che.kyutech.ac.jp](mailto:tohno@che.kyutech.ac.jp) (Teruhisa Ohno)**

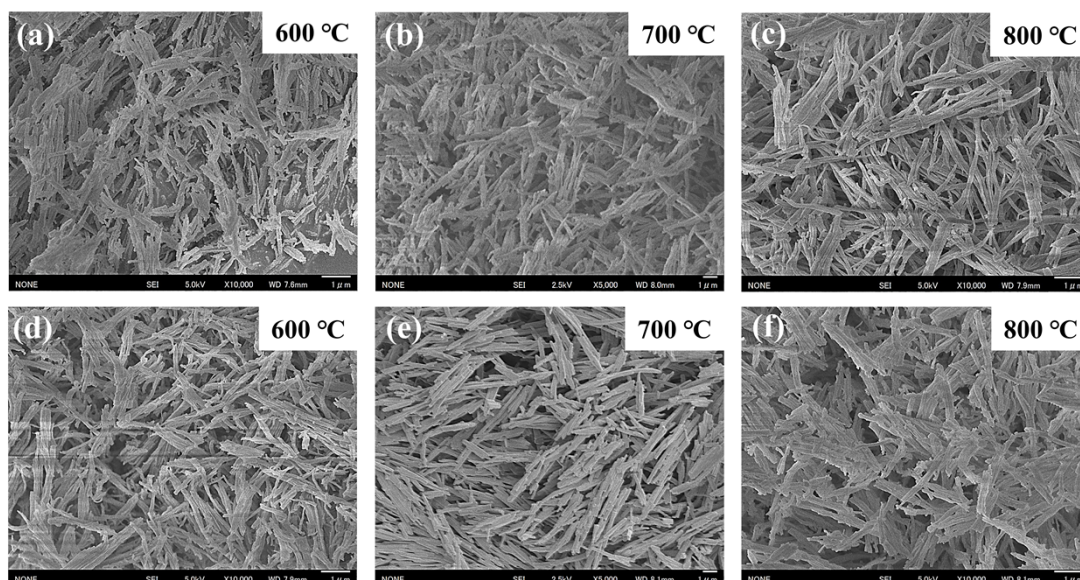

**Figure S1. FE-SEM images of (a-c) undoped CeO<sub>2</sub> and (d-f) NS-CeO<sub>2</sub> samples annealed under different temperature conditions, respectively.**

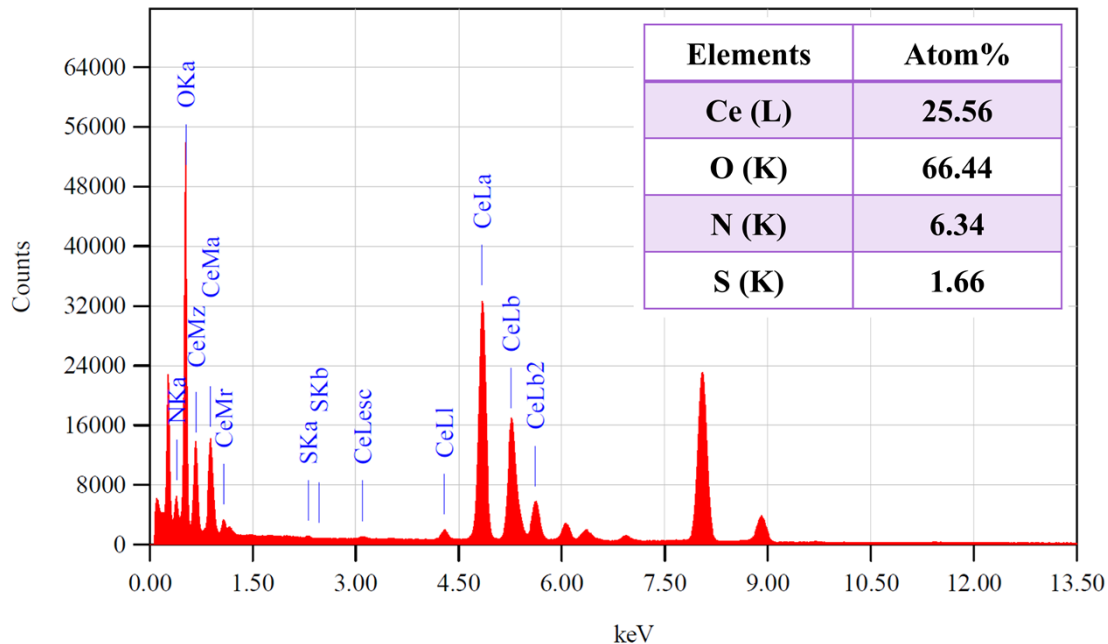

**Figure S2. Selected area EDS spectrum of NS-CeO<sub>2</sub> sample annealed at 700 °C condition.**

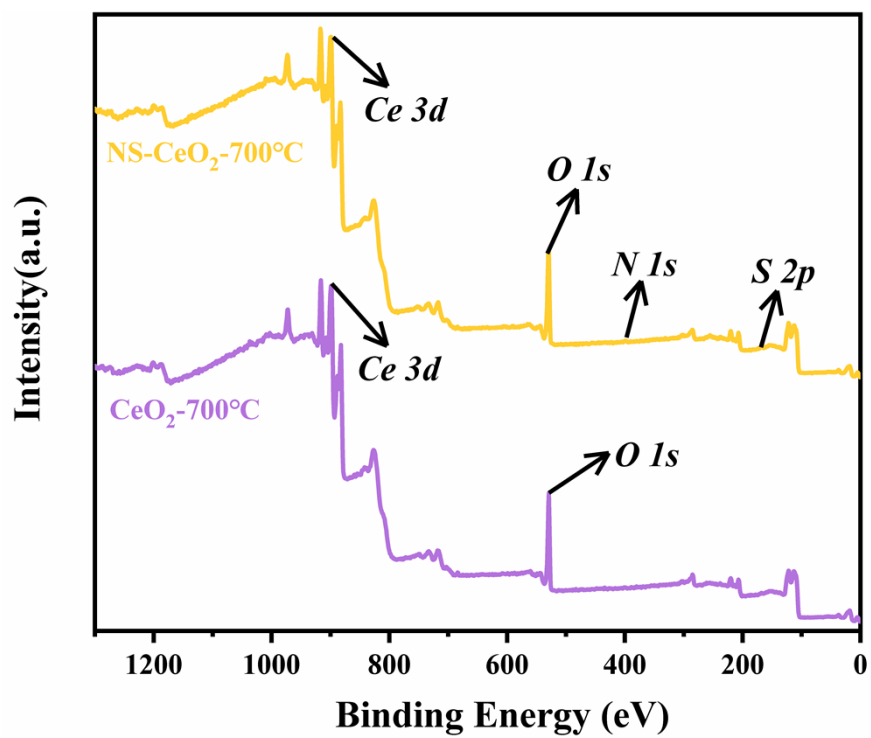

Figure S3. Wide scanning XPS survey spectra of undoped CeO<sub>2</sub> and NS-CeO<sub>2</sub> samples annealed at 700°C condition.

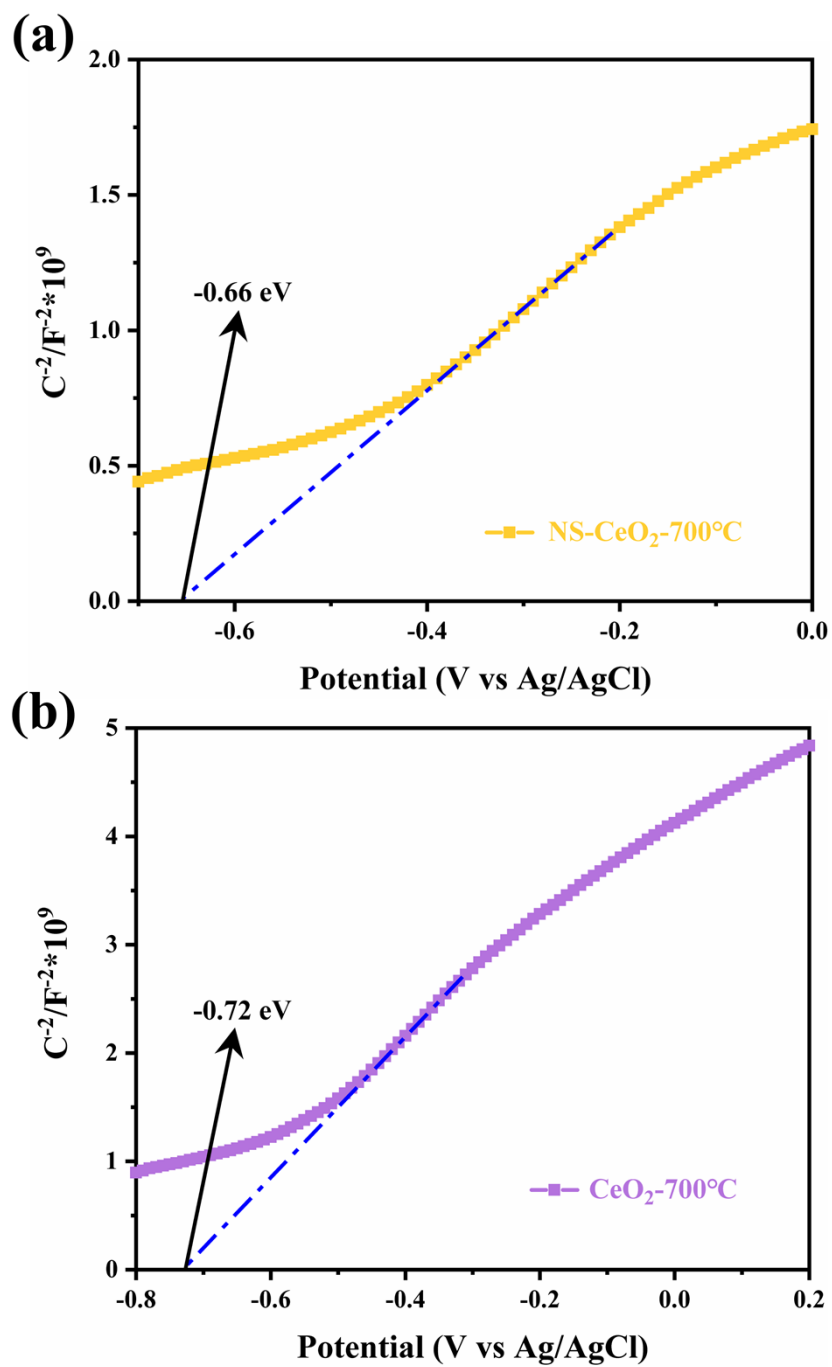

Figure S4. Mott-Schottky (M-S) plots of undoped  $\text{CeO}_2$  and NS- $\text{CeO}_2$  samples annealed at  $700^\circ\text{C}$  condition.

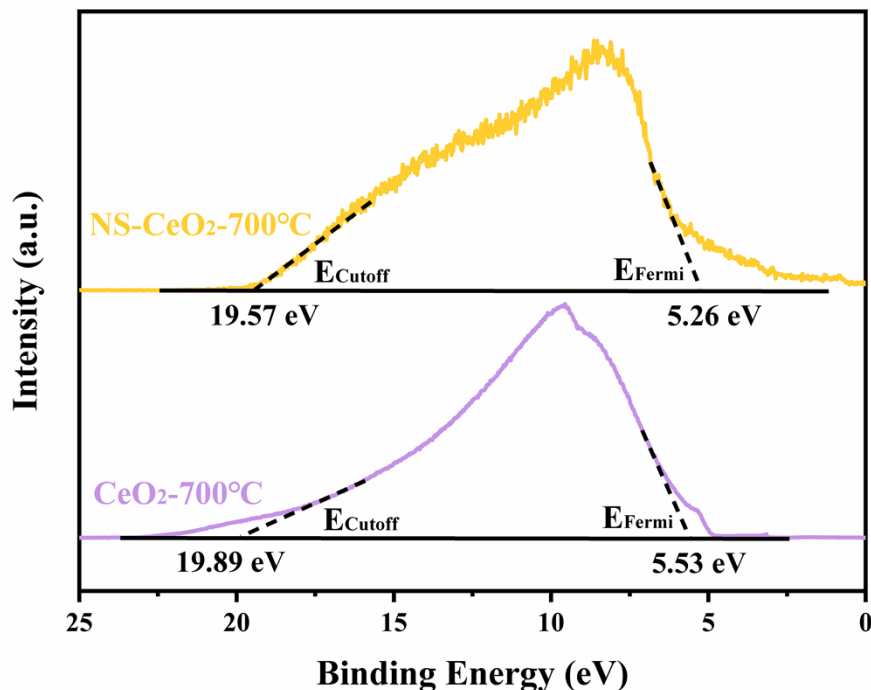

**Figure S5. Ultraviolet photoelectron spectroscopy (UPS) signals of NS-CeO<sub>2</sub> and undoped CeO<sub>2</sub> samples annealed at 700°C condition.**

According to the linear intersection method, the valence band ( $E_{VB}$ ) of NS-CeO<sub>2</sub> was calculated to be 6.91 eV (vs. vacuum) from  $(E_{Photo} - (E_{Cutoff} - E_{Fermi}))$  ( $E_{Photo} = 21.22$  eV, the excitation energy of the He I). According to the reference standard of the electron volts convert to electrochemical energy potentials in volts, 0 V versus RHE (reversible hydrogen electrode) corresponding to -4.44 eV versus *evac* (vacuum level). Then combined with the bandgap value calculated from Tauc plot analysis of NS-CeO<sub>2</sub> ( $E_g = 2.98$  eV), the corresponding conduction band (CB) value is further calculated by the equation  $E_{CB} = E_{VB} - E_g$ . Thus, the VB and CB positions of NS-CeO<sub>2</sub> are calculated to 2.47 and -0.51 eV, respectively. Notably, these values are very close to that currently obtained from band gap Tauc's plot and Mott-Schottky (M-S) plots ( $E_{VB} = 2.42$  eV,  $E_{VB} = -0.56$  eV).

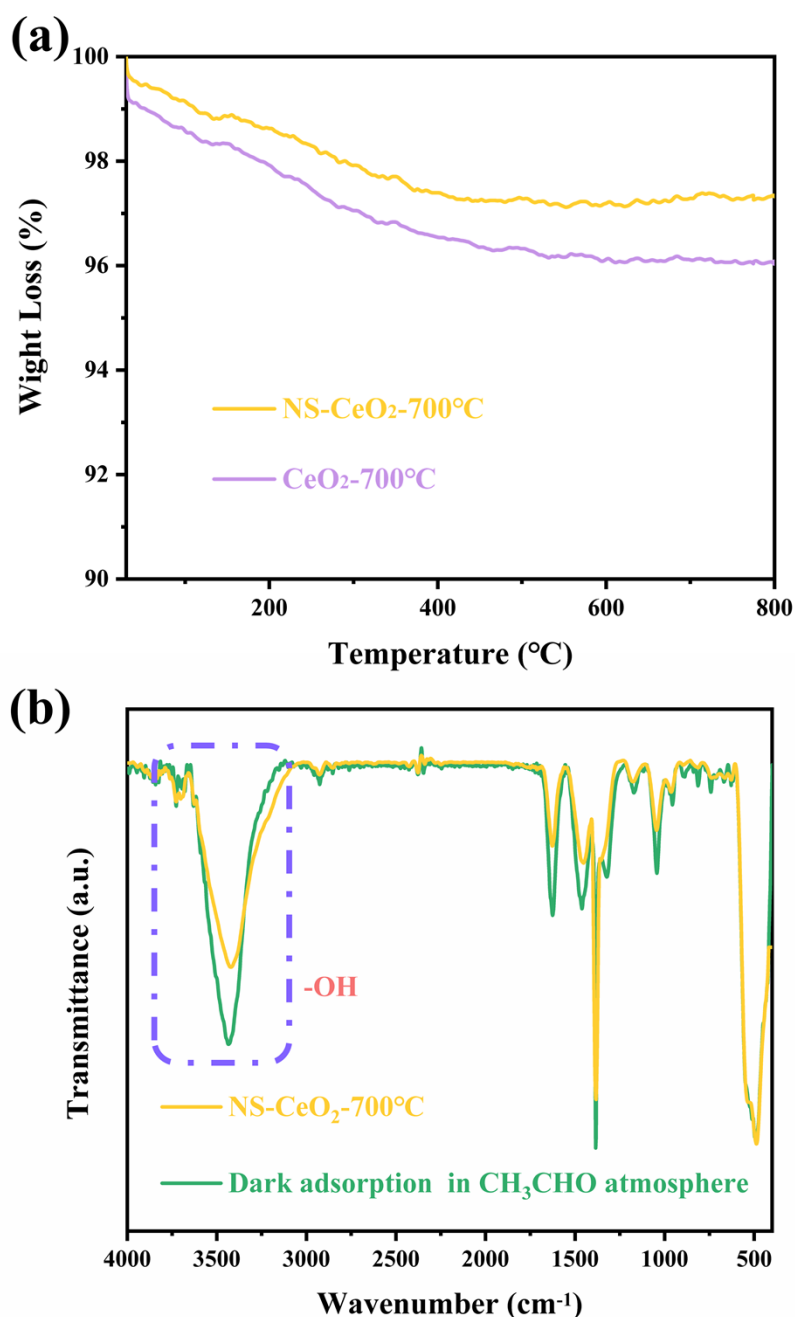

**Figure S6. (a) TG curves of NS-CeO<sub>2</sub> and pure CeO<sub>2</sub>; and (b) FT-IR spectrum of NS-CeO<sub>2</sub> before and after dark adsorption equilibrium in CH<sub>3</sub>CHO atmosphere for 1h.**

TG measurement was used to confirm the partial adsorption of water on the surface of the photocatalysts convincingly. In addition, FT-IR spectrum of NS-CeO<sub>2</sub> contained a significant peak at 3450 cm<sup>-1</sup> and this peak was attributed to the hydroxyl vibration of adsorption of water on the photocatalysts surface. While after dark adsorption equilibrium in CH<sub>3</sub>CHO atmosphere for 1h, the stronger characteristic absorption peak of -OH can be clearly observed in NS-CeO<sub>2</sub>, indicating a further increase tendency of water content on its surface.

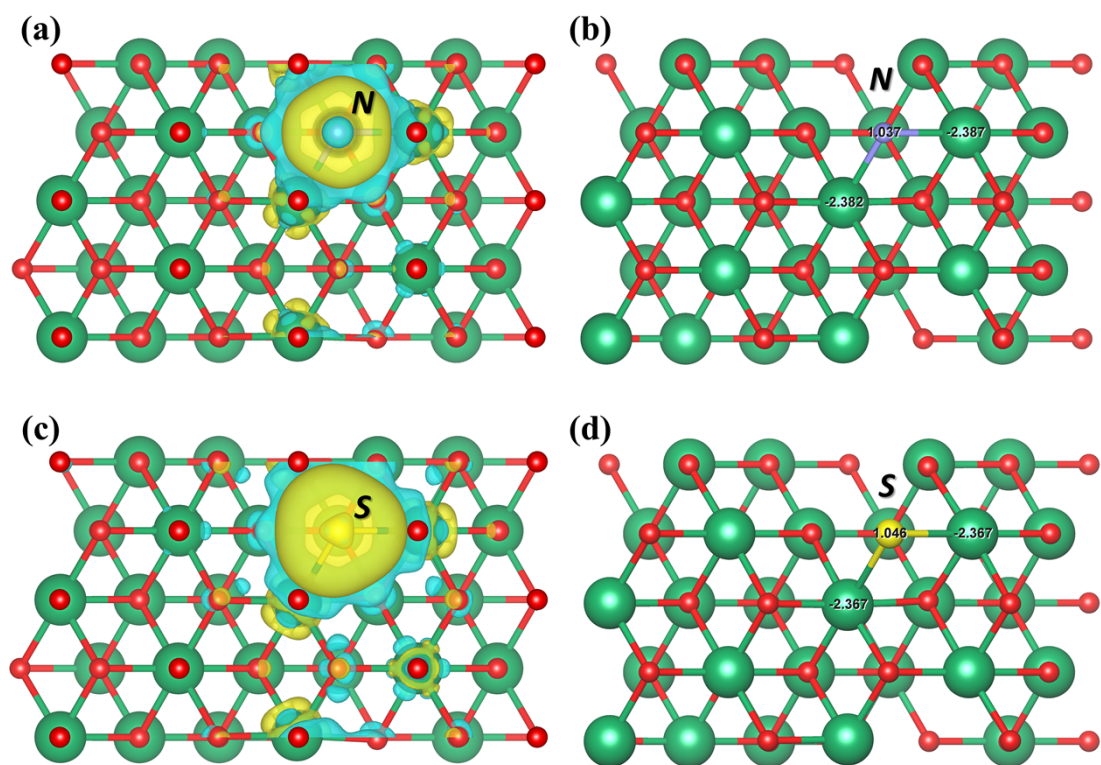

Figure S7. Bader charge diagram and calculated cross view charge density differences of (a, b) N doped-CeO<sub>2</sub> and (c, d) S doped-CeO<sub>2</sub>.

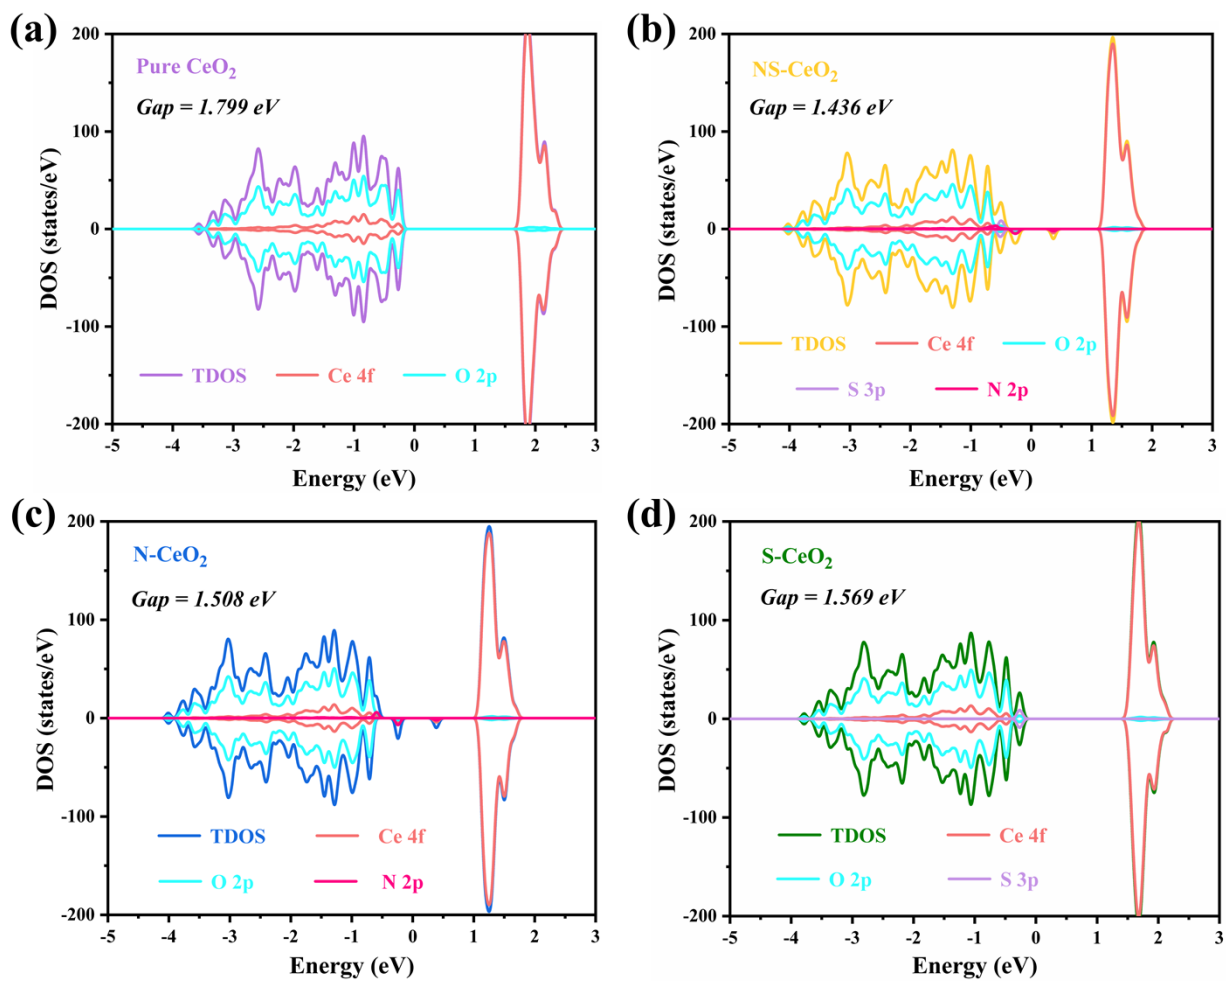

**Figure S8.** Results for total and partial density of states (DOS) of (a) pure CeO<sub>2</sub>, (b) NS-CeO<sub>2</sub>, (c) N-CeO<sub>2</sub> and (d) S-CeO<sub>2</sub>.s
